CORRECTION

# Correction: Distribution of Total Depressive Symptoms Scores and Each Depressive Symptom Item in a Sample of Japanese Employees

Shinichiro Tomitaka, Yohei Kawasaki, Kazuki Ide, Hiroshi Yamada, Hirotugu Miyake, Toshiaki A. Furukawa

The sixth author's name is incorrectly spelled. The correct name is: Toshiaki A. Furukawa. The correct citation is: Tomitaka S, Kawasaki Y, Ide K, Yamada H, Miyake H, Furukawa TA (2016) Distribution of Total Depressive Symptoms Scores and Each Depressive Symptom Item in a Sample of Japanese Employees. PLoS ONE 11(1): e0147577. doi:[10.1371/journal.pone.0147577](https://doi.org/10.1371/journal.pone.0147577)

## Reference

1. Tomitaka S, Kawasaki Y, Ide K, Yamada H, Miyake H, Furukawa TA (2016) Distribution of Total Depressive Symptoms Scores and Each Depressive Symptom Item in a Sample of Japanese Employees. PLoS ONE 11(1): e0147577. doi: [10.1371/journal.pone.0147577](https://doi.org/10.1371/journal.pone.0147577) PMID: [26812649](https://pubmed.ncbi.nlm.nih.gov/26812649/)

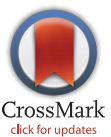

## OPEN ACCESS

**Citation:** Tomitaka S, Kawasaki Y, Ide K, Yamada H, Miyake H, Furukawa TA (2016) Correction: Distribution of Total Depressive Symptoms Scores and Each Depressive Symptom Item in a Sample of Japanese Employees. PLoS ONE 11(3): e0152645. doi:[10.1371/journal.pone.0152645](https://doi.org/10.1371/journal.pone.0152645)

**Published:** March 24, 2016

**Copyright:** © 2016 Tomitaka et al. This is an open access article distributed under the terms of the [Creative Commons Attribution License](https://creativecommons.org/licenses/by/4.0/), which permits unrestricted use, distribution, and reproduction in any medium, provided the original author and source are credited.
